# Supplementary material for: Modulation of lipopolysaccharide-induced neuronal response by activation of the enteric nervous system
Source: Springer Nature journal article supplement (doi:10.1186/s12974-014-0202-7), 2014-12-01
Supplement: MOESM1 [file 9768458]

**Additional file 1**

EFS induces only neuronal activation.

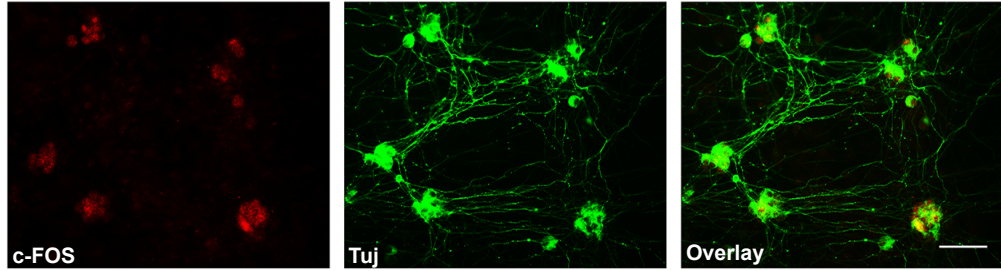

Immunocytochemical double labeling of rENSpc were performed using anti-c-Fos (Calbiochem) and anti-Tuj ( $\beta$ III-tubulin; Sigma) antibodies after 7 hours of EFS. Scale bar : 50 $\mu$ m.

Overlay

Overlay
